# Supplementary material for: A Case Report of Chronic Stress in Honey Bee Colonies Induced by Pathogens and Acaricide Residues
Source: MDPI journal article supplement (doi:10.3390/pathogens10080955), 2021-07-29
Supplement: s1 [file s1]

## Supplementary information

**Table S.1** Details of calculation of TUm values. Total ppb converted to acute dose ( $\mu\text{g}/\text{bee}$ ) considering a maximum consumption rate of 12 mg bb/bee/d (beebread matrix). Surrogate LD50m ( $\mu\text{g}/\text{bee}$ ) calculated by using  $(\Sigma \text{pi} / \text{LD50i}) - 1$ . Ln(TUm: natural logarithm of the toxic unit of the mixture

|                   |   | Residues               |                        |                        |                        |                        |                              | Toxicity (µg/bee) |                        |                        | Toxic Unit of the mixture (TUm) |         |
|-------------------|---|------------------------|------------------------|------------------------|------------------------|------------------------|------------------------------|-------------------|------------------------|------------------------|---------------------------------|---------|
| Matrix            | n | Coumaphos (CMF)        |                        | Tau-fluvalinate (FVT)  |                        | total<br>ppb           | surrogated<br>dose<br>µg/bee | LD50              | LD50 tau               | surrogate              | TUm                             | Ln(TUm) |
|                   |   | ppb                    | proportion             | ppb                    | proportion             |                        |                              | coumafos          | fluvalinate            | LD50m                  |                                 |         |
| Dead colonies     |   |                        |                        |                        |                        |                        |                              |                   |                        |                        |                                 |         |
| D1                | 2 | 4.35 10 <sup>+02</sup> | 9.84 10 <sup>-01</sup> | 7.00                   | 1.58 10 <sup>-02</sup> | 4.42 10 <sup>+02</sup> | 5.30 10 <sup>-03</sup>       |                   |                        | 3.14                   | 1.69 10 <sup>-03</sup>          | -6.38   |
| D2                | 2 | 4.15 10 <sup>+02</sup> | 9.8310 <sup>-01</sup>  | 7.00                   | 1.66 10 <sup>-02</sup> | 4.22 10 <sup>+02</sup> | 5.06 10 <sup>-03</sup>       |                   |                        | 3.14                   | 1.61 10 <sup>-03</sup>          | -6.43   |
| D3                | 1 | 2.02 10 <sup>+02</sup> | 1                      | <LOQ                   | 0                      | 2.02 10 <sup>+02</sup> | 2.42 10 <sup>-03</sup>       |                   |                        | 3.10                   | 7.82 10 <sup>-04</sup>          | -7.15   |
| D4                | 2 | 3.50 10 <sup>+02</sup> | 9.64 10 <sup>-01</sup> | 1.30 10 <sup>+01</sup> | 3.58 10 <sup>-02</sup> | 3.63 10 <sup>+02</sup> | 4.36 10 <sup>-03</sup>       | 3.10              | 1.22 10 <sup>+01</sup> | 3.19                   | 1.37 10 <sup>-03</sup>          | -6.59   |
| D5                | 2 | 3.23 10 <sup>+02</sup> | 9.73 10 <sup>-01</sup> | 9.00                   | 2.71 10 <sup>-02</sup> | 3.32 10 <sup>+02</sup> | 3.98 10 <sup>-03</sup>       |                   |                        | 3.16                   | 1.26 10 <sup>-03</sup>          | -6.61   |
| mean              |   | 3.45 10 <sup>+02</sup> | 9.81 10 <sup>-01</sup> | 7.20                   | 1.91 10 <sup>-02</sup> | 3.52 10 <sup>+02</sup> | 4.23 10 <sup>-03</sup>       |                   |                        | 3.14                   | 1.34 10 <sup>-03</sup>          |         |
| d.s               |   | 9.21 10 <sup>+01</sup> | 1.35 10 <sup>-02</sup> | 4.71                   | 1.35 10 <sup>-02</sup> | 9.49 10 <sup>+01</sup> | 1.14 10 <sup>-03</sup>       |                   |                        | 3.20 10 <sup>-02</sup> | 3.59 10 <sup>-04</sup>          |         |
| Survival colonies |   |                        |                        |                        |                        |                        |                              |                   |                        |                        |                                 |         |
| S1                | 2 | 2.83 10 <sup>+02</sup> | 9.76 10 <sup>-01</sup> | 7.00                   | 2.41 10 <sup>-02</sup> | 2.90 10 <sup>+02</sup> | 3.48 10 <sup>-03</sup>       |                   |                        | 3.16                   | 1.10 10 <sup>-03</sup>          | -6.81   |
| S2                | 2 | 5.45 10 <sup>+02</sup> | 9.84 10 <sup>-01</sup> | 9.00                   | 1.62 10 <sup>-02</sup> | 5.54 10 <sup>+02</sup> | 6.65 10 <sup>-03</sup>       |                   |                        | 3.14                   | 2.12 10 <sup>-03</sup>          | -6.16   |
| S3                | 2 | 2.23 10 <sup>+03</sup> | 9.96 10 <sup>-01</sup> | 1.00 10 <sup>+01</sup> | 4.46 10 <sup>-03</sup> | 2.24 10 <sup>+03</sup> | 2.69 10 <sup>-02</sup>       |                   |                        | 3.11                   | 8.64 10 <sup>-03</sup>          | -4.75   |
| S4                | 2 | 4.65 10 <sup>+02</sup> | 9.69 10 <sup>-01</sup> | 1.50 10 <sup>+01</sup> | 3.13 10 <sup>-02</sup> | 4.80 10 <sup>+02</sup> | 5.76 10 <sup>-03</sup>       |                   |                        | 3.17                   | 1.81 10 <sup>-03</sup>          | -6.31   |
| S5                | 2 | 1.14 10 <sup>+03</sup> | 9.83 10 <sup>-01</sup> | 2.00 10 <sup>+01</sup> | 1.73 10 <sup>-02</sup> | 1.16 10 <sup>+03</sup> | 1.39 10 <sup>-02</sup>       |                   |                        | 3.14                   | 4.41 10 <sup>-03</sup>          | -5.42   |
| S6                | 2 | 3.05 10 <sup>+02</sup> | 9.50 10 <sup>-01</sup> | 1.60 10 <sup>+01</sup> | 4.98 10 <sup>-02</sup> | 3.21 10 <sup>+02</sup> | 3.85 10 <sup>-03</sup>       | 3.10              | 1.22 10 <sup>+01</sup> | 3.22                   | 1.20 10 <sup>-03</sup>          | -6.73   |
| S7                | 2 | 7.75 10 <sup>+02</sup> | 9.77 10 <sup>-01</sup> | 1.80 10 <sup>+01</sup> | 2.27 10 <sup>-02</sup> | 7.93 10 <sup>+02</sup> | 9.52 10 <sup>-03</sup>       |                   |                        | 3.15                   | 3.02 10 <sup>-03</sup>          | -5.80   |
| S8                | 2 | 8.50 10 <sup>+02</sup> | 9.78 10 <sup>-01</sup> | 1.90 10 <sup>+01</sup> | 2.19 10 <sup>-02</sup> | 8.69 10 <sup>+02</sup> | 1.04 10 <sup>-02</sup>       |                   |                        | 3.15                   | 3.31 10 <sup>-03</sup>          | -5.71   |
| S9                | 2 | 9.36 10 <sup>+02</sup> | 9.86 10 <sup>-01</sup> | 1.30 10 <sup>+01</sup> | 1.37 10 <sup>-02</sup> | 9.49 10 <sup>+02</sup> | 1.14 10 <sup>-02</sup>       |                   |                        | 3.13                   | 3.64 10 <sup>-03</sup>          | -5.62   |
| S10               | 2 | 8.45 10 <sup>+02</sup> | 9.85 10 <sup>-01</sup> | 1.30 10 <sup>+01</sup> | 1.52 10 <sup>-02</sup> | 8.58 10 <sup>+02</sup> | 1.03 10 <sup>-02</sup>       |                   |                        | 3.14                   | 3.28 10 <sup>-03</sup>          | -5.72   |
| mean              |   | 8.37 10 <sup>+02</sup> |                        | 1.40 10 <sup>+01</sup> |                        | 8.51 10 <sup>+02</sup> | 1.02 10 <sup>-02</sup>       |                   |                        | 3.15                   | 3.25 10 <sup>-03</sup>          |         |
| d.s               |   | 5.63 10 <sup>+02</sup> |                        | 4.40                   |                        | 5.63 10 <sup>+02</sup> | 6.76 10 <sup>-03</sup>       |                   |                        | 2.95 10 <sup>-02</sup> | 2.18 10 <sup>-03</sup>          |         |
| Overall mean      |   |                        |                        |                        |                        |                        |                              |                   |                        |                        |                                 |         |
| beebread          |   | 6.73 10 <sup>+02</sup> | 9.83 10 <sup>-01</sup> | 1.17 10 <sup>+01</sup> | 1.71 10 <sup>-02</sup> | 6.85 10 <sup>+02</sup> | 8.22 10 <sup>-03</sup>       | 3.10              | 1.22 10 <sup>+01</sup> | 3.14                   | 2.62 10 <sup>-03</sup>          | -5.95   |



**Table S.2** Primers used for each pathogen in PCR reactions

|         | Pathogen               | Primer      | Sequence                                 | Amplicon size |
|---------|------------------------|-------------|------------------------------------------|---------------|
| PCR     | <b>N. ceranae</b>      | 218 CER-F   | 5'-CGGCGACGATGTGATATGAAAATATTAA-3'       | 218-219 pb    |
|         |                        | 218 CER-R   | 5'-CCCGGTCATTCTCAAACAAAAAACCG-3'         |               |
|         | <b>N.apis</b>          | 218 CER-F   | 5'-GGGGGCATGTCTTTGACGTACTATGTA-3'        | 321 pb        |
|         |                        | 218 CER-R   | 5'-GGGGGGCGTTTAAAATGTGAAACAACACTATG-3'   |               |
|         | <b>Trypanosomatids</b> | CRI-SEF     | 5'- CTTTTGGTCGGTGGAGTGAT- 3'             | 417 pb        |
|         |                        | CRI-SER     | 5'- GGACGTAATCGGCACAGTTT- 3'             |               |
|         | <b>L.passim</b>        | LpCytb_F1   | 5'-CGAAGTGCACATATATGCTTTAC-3'            | 247 pb        |
|         |                        | LpCytb_R    | 5'-GCCAAACACCAATAACTGGTACT-3'            |               |
|         | <b>C. mellificae</b>   | CmCytb_F    | 5'-AGTTTGAGCTGTTGGATTGTGTT-3'            | 140 pb        |
|         |                        | CmCytb_R    | 5'-AACCTATTACAGGCACAGTTGC-3'             |               |
|         | <b>Neogregarines</b>   | API-NEOF    | 5'- CCAGCATGGAATAACATGTAAGG- 3'          | 260 pb        |
|         |                        | API-NEOR    | 5'- GACAGCTTCCAATCTCTAGTCG- 3'           |               |
| RT-PCR  | <b>A. woodi</b>        | AW180-FOR   | 5'-GGAATATGATCTGGTTTAGTTGGTC-3'          | 180 pb        |
|         |                        | AW180-REV   | 5'- GAATCAATTTCCAAACCCACCAATC-3'         |               |
|         | <b>LSV-complex</b>     | LSVdeg-F    | 5'-GCCWCGRYTGTTGGTYCCCCC-3'              | 600 pb        |
|         |                        | LSVdeg-R    | 5'-GAGGTGGCGGCGCSAGATAAAGT-3'            |               |
|         | <b>AKI</b>             | AKI-F       | 5'-CTTTCATGATGTGGAAACTCC-3'              | 100 pb        |
|         |                        | AKI-R       | 5'-AAACTGAATAATACTGTGCGTA-3'             |               |
| RT-qPCR | <b>BQCV</b>            | BQCV 9195F  | 5'-GGTGCGGGAGATGATATGGA-3'               | 305 pb        |
|         |                        | BQCV 265r   | 5'-GCCGTCTGAGATGCATGAATAC-3'             |               |
|         |                        | BQCV 8217T* | 5'-FAM-TTTCATCTTTATCGGTACGCCGCC-TAMRA-3' |               |
|         | <b>DWV</b>             | DWV 9587F   | 5'-CCTGGACAAGGTCTCGGTAGAA-3'             | 250 pb        |
|         |                        | DWV 9711R   | 5'-ATTCAGGACCCCAACCAAAT-3'               |               |
|         |                        | DWV 9627T*  | 5'-FAM-CATGCTCGAGGATTGGGTCGTCGT-TAMRA-3' |               |

\*5' (FAM, 6-carboxy-Fluoresceína); 3' (TAMRA, tetra-metilcarboxyrhodamina)



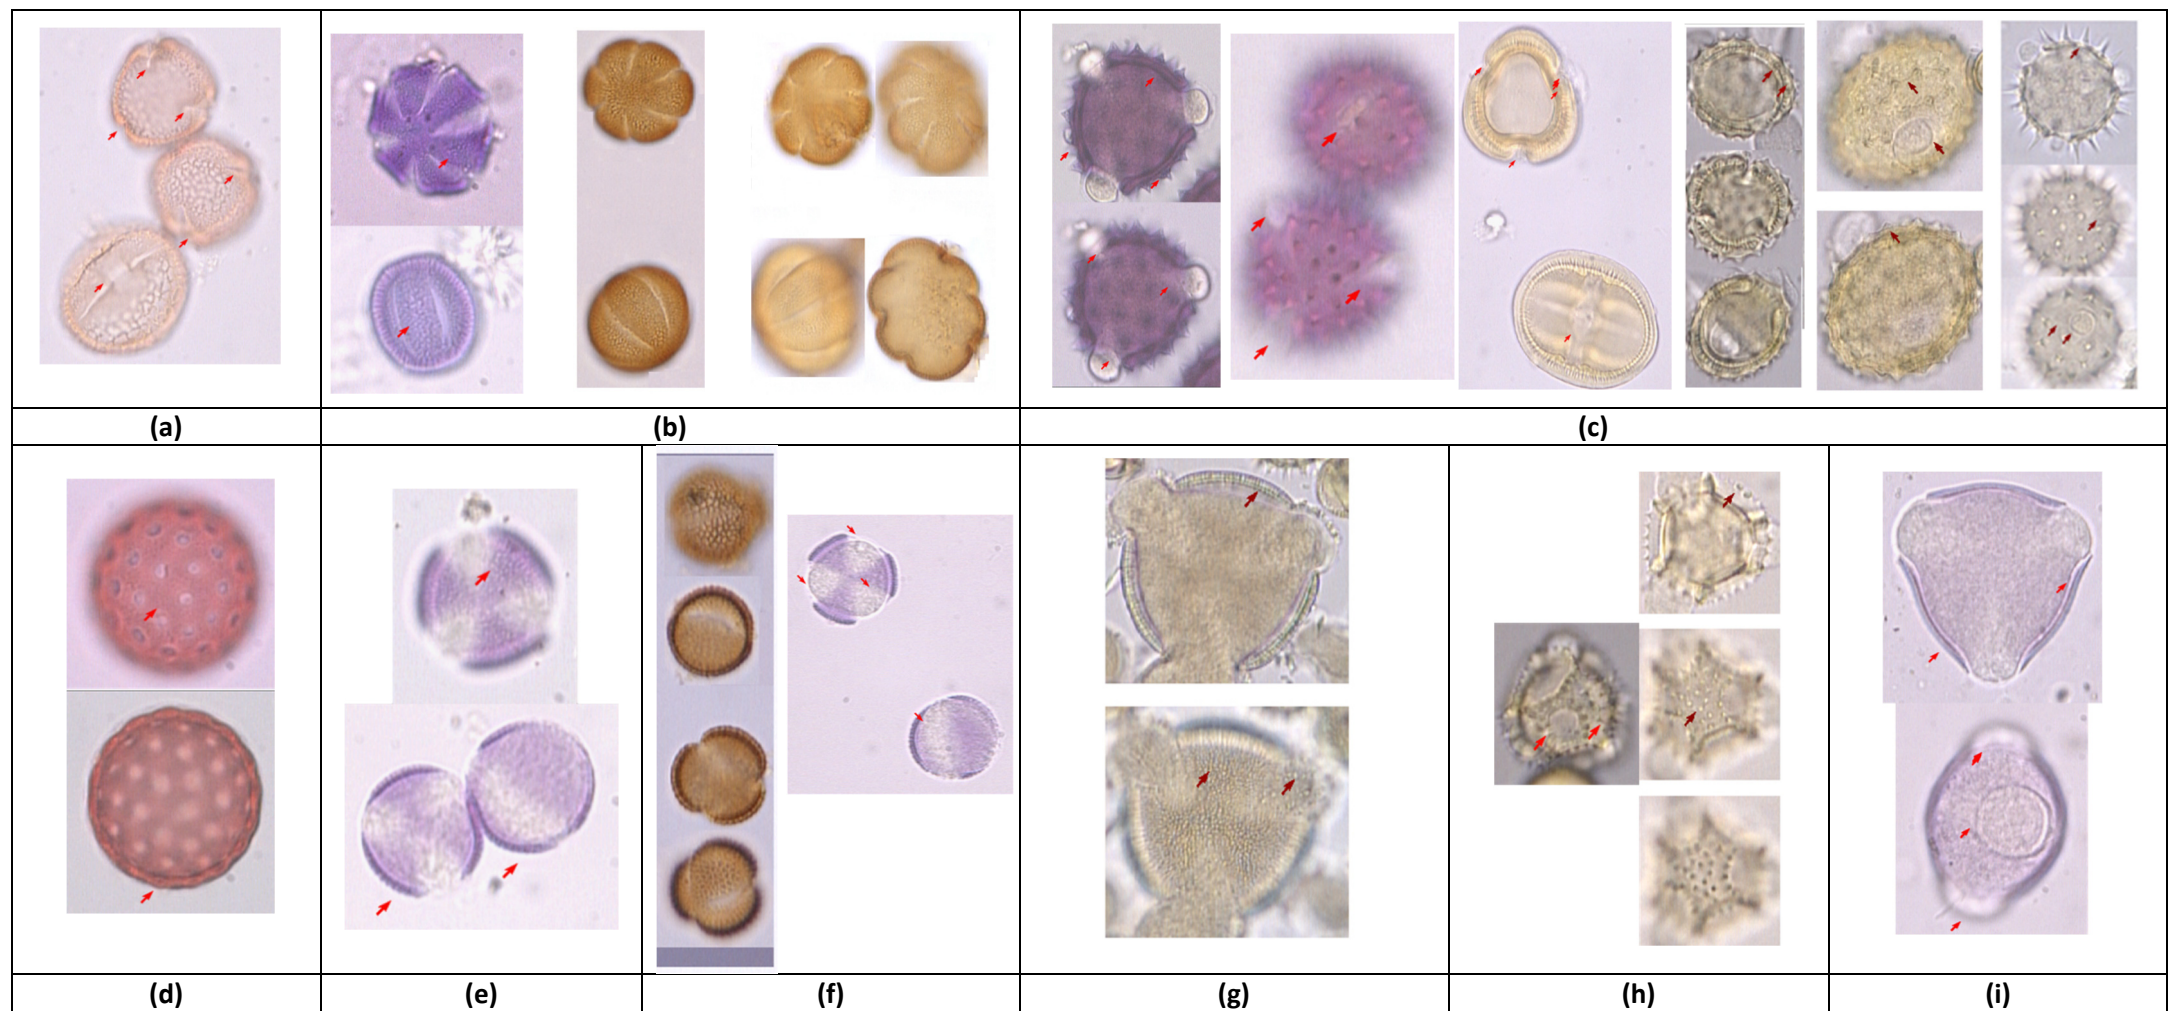

**Figure S1.** Main taxa identified of the pollen grains found in the beebread samples. Red rows: ornamental features and pollen apertures.

(a) *Hedera helix* (Araliaceae). (b) *Labiatae*: *Lavandula latifolia* L.; *Thymus* L.; *Rosmarinus officinalis* L. (c) *Asteraceae*: *Carduus* t.; *Calendula* t.; *Carlina* t.; *Centaurea* t.; *Carthamus lanatus* L.; *Helianthus annuus* L. (d) *Chenopodiaceae* . (e) *Brassicaceae*: *Diplotaxis* t.; (f) *Brassicaceae* t. (g) *Convolvulaceae*. (h) *Cichorioideae*. (i) *Rosaceae*: *Prunus* t.
